# Supplementary material
Source: publisher site journal article supplement (https://www.dovepress.com/article/supplementary_file/555622/555622-supplementary_1.docx)
Supplement: Supplementary file 1 [file 555622-supplementary_1.docx]

**Supplement: Complete Survey**

**S1: Survey**

**OBESITY MEDICATION TREATMENT PERSPECTIVES AMONG PEOPLE WITH OVERWEIGHT OR OBESITY**

**TARGET SAMPLE PLAN:**

- 20 min LOI: Target Total Sample: n=110
  - Current GLP1 Users: n=75 **(S14_1-5=A)**
  - Current Non-GLP1 Users (have considered GLP1s): n=35 **(S14_6-9=A AND S14b=1-5)**
  - Sub-Quotas:
    - Previous GLP1 Users: Min of n=30 **(S14_1-5=B)**
    - Have Fatty liver Disease: Min of n=15 **(S12_4)**

**PROGRAMMING NOTES:**

- Programming notes are in **blue**
- Termination notes are in **red**
- Notes for data file are in **green**

**SCREENER**

**ASK ALL**

S1.Welcome and thank you for your interest in this survey. Your responses will be collected with other respondents and reported only in aggregate. Here are a few things to remember as you take the survey:

- This is not a test; there are no right or wrong answers. We are interested in your honest opinions.
- If you are uncertain of the exact answer to a question, please provide your best estimate.
- If you need to stop the survey and close it part way through, you can come back in and complete it later. The program will bring you back into the survey at the point where you paused.

We will begin by asking you a few questions to ensure that you meet the eligibility criteria for this study.

**ASK ALL**

S2.This research is conducted for the benefit of a pharma company. The pharma company is not a recipient of your personal data and, thus, will never have access to your personal data. The pharma company shall only receive anonymized results analyzed across all respondents to this survey. None of these results will be used to support measures or decisions regarding you personally. The sole exception would be if adverse events (i.e., side effects) are mentioned by you during the research. This adverse event will be communicated to the pharma company expressly to comply with its own safety legal duties.

We are required to pass on to our client details of adverse events and/or product complaints that are mentioned during the course of survey. Although what you say will, of course, be treated in confidence, should you raise during the survey an adverse event and/or product complaint, we will need to report this even if it has already been reported by you directly to the company or the regulatory authorities.

Are you happy to proceed with the interview on this basis?

| 1 | Yes |  |
| --- | --- | --- |
| 2 | No | **TERMINATE IMMEDIATELY** |

**ASK ALL**

S3. During this survey you may be shown certain confidential information. By participating in this survey, you agree that you will neither use nor disclose to any other person or entity any of the information provided to you in this study. By selecting “Accept” below, you signify that you understand and agree with these terms. If you cannot agree with these terms, or wish to not participate in this survey, select “No thanks” below.

| 1 | Accept |  |
| --- | --- | --- |
| 2 | No thanks | **TERMINATE IMMEDIATELY** |

**ASK ALL**

S5. What is your age?

________ years olds **RANGE 0-99**
 **TERMINATE IMMEDIATELY IF < 21**

**ASK ALL**

S6. Which of the following is your preferred gender recognition? **READ LIST**

|  | RANDOMIZE |
| --- | --- |
| 1 | Male |
| 2 | Female |
| 3 | Non-binary |
| 4 | Other, self-describe as: **[Specify] [ANCHOR]** |
| 5 | Prefer not to answer **[ANCHOR]** |

**RECRUIT A MIX OF MALE/FEMALE**

**ASK ALL**

S7. In which state do you currently reside?

_____

**RECRUIT A MIX OF REGIONS; CODE IN DATA FILE BY STATE & REGION:**

| Region 1: Connecticut, Maine, Massachusetts, New Hampshire, Rhode Island, and Vermont |
| --- |
| Region 2: New York, Pennsylvania, New Jersey, Delaware, Maryland, and Washington D.C. |
| Region 3: Virgina, West Virgina, Tennessee, South Carolina, North Carolina, Louisiana, Mississippi, Kentucky, Georgia, Florida, Arkansas, and Alabama |
| Region 4: Ohio, Michigan, Indiana, Illinois, Wisconsin, Missouri, Iowa, Minnesota, North Dakota, South Dakota, Nebraska, and Kansas |
| Region 5: Texas, Oklahoma, New Mexico, Arizona |
| Region 6: Colorado, Wyoming, Montana, Idaho, Utah, Nevada, Washington, Oregon, California, Alaska, and Hawaii |

**ASK ALL**

S8. Are you currently involved or have you participated in a clinical trial in the past 6 months?

| 1 | Yes | **TERMINATE** |
| --- | --- | --- |
| 2 | No | **CONTINUE** |

**ASK ALL**

S9. What is your approximate height in feet and inches?

**PLEASE RECORD [RANGE 3-7 FEET AND 0-12 INCHES]**

________ feet ________ inches

**ASK ALL**

S10. What is your current weight in pounds?

**PLEASE RECORD**

________ pounds **[RANGE 50-600]**

**USE ACCOMPANYING BMI EXCEL DOCUMENT TO CALCULATE BMI. DO NOT READ BMI TO RESPONDENT**

**BMI = WEIGHT IN LBS / HEIGHT IN INCHES / HEIGHT IN INCHES * 703**

BMI = __________ **BMI MUST BE 27 OR HIGHER, ELSE TERMINATE IMMEDIATELY**

**RECRUIT A MIX:**

- **BMI 27-29.9**
- **BMI 30-34.9,**
- **BMI 35-39.9,**
- **BMI 40+**

**ASK ALL**

S11. Do you consider yourself a body builder and/or power lifter?

| 1 | Yes | **TERMINATE IMMEDIATELY** |
| --- | --- | --- |
| 2 | No |  |

**ASK IF NON-MALE (S6=2-5)**

S11a. Are you currently pregnant?

| 1 | Yes | **TERMINATE IMMEDIATELY** |
| --- | --- | --- |
| 2 | No |  |

**ASK ALL**

S12. What, if any, health conditions are you living with currently? *Please select all that apply.*

|  | **MULTI-SELECT; RANDOMIZE** |  |
| --- | --- | --- |
| 1 | High blood pressure |  |
| 2 | High cholesterol/elevated blood lipids |  |
| 3 | Sleep apnea |  |
| 4 | Fatty Liver Disease, *also known as:*   - *Metabolic dysfunction-associated steatohepatitis (MASH) or Non-alcoholic steatohepatitis (NASH)* - *Metabolic dysfunction-associated fatty liver disease (MAFLD), Non-alcoholic fatty liver disease (NAFLD), or Metabolic dysfunction-associated steatotic liver disease (MASLD)* |  |
| 7 | Type 2 Diabetes |  |
| 8 | Heart disease |  |
| 9 | Osteoarthritis (incl. Knee, Hip, Joint Pain) |  |
| 10 | Depression |  |
| 11 | Osteoporosis |  |
| 12 | Obesity or overweight |  |
| 13 | Polycystic ovary syndrome (PCOS)  **[ONLY SHOW IF NON-MALE, SELECTED S6=2-5]** |  |
| 14 | Uterine fibroids (UF)  **[ONLY SHOW IF NON-MALE, SELECTED S6=2-5]** |  |
| 15 | Chronic Kidney Disease |  |
| 16 | Heart Failure |  |
| 17 | Clinically Significant Portal Hypertension |  |
| 18 | Cancer |  |
| 95 | Other: **[Specify] ANCHOR** |  |
| 96 | None of the above **ANCHOR, MUTUALLY EXCLUSIVE** |  |

**PATIENTS MUST HAVE BMI OF 28+ (CAN HAVE HEALTH CONDITION OR NOT) OR BMI OF 27-27.99 WITH AT LEAST ONE** **OF THE HEALTH CONDITIONS LISTED ABOVE AMONG S12_1-11, OR S12_13-17**

**RECRUIT MINIMUM OF N=15 AMONG S12=4 (FATTY LIVER DISEASE, NASH/MASH, MASLD/MAFLD/NAFLD)**

**ASK ALL**

S13a. Which of the following descriptions best applies to you? *Please select one.*

| 1 | I am currently on a weight loss medication **prescribed** by a health care professional | CONTINUE |
| --- | --- | --- |
| 2 | I am currently on a weight loss medication or supplement **not prescribed** by a health care professional (e.g., purchased without a prescription) | **CONTINUE** |
| 3 | I am **not** currently on a weight loss medication **prescribed** by a health care professional but have been on one previously | **TERMINATE** |
| 4 | I am **not** currently on a weight loss medication **not prescribed** by a health care professional but have been on one previously | **TERMINATE** |
| 5 | I have never taken weight loss medication but have considered it | TERMINATE |
| 6 | I have never taken weight loss medication and **would not consider it** | **TERMINATE** |

**ASK ALL**

S13ai. Which of the following best applies to you?

|  |  | **I have had this**  **(A)** | **I plan to have this**  **(B)** | **Neither**  **(C)** |
| --- | --- | --- | --- | --- |
| 1 | **Weight loss surgery** (e.g., bariatric surgery, gastric balloon or any other surgical procedure for weight loss) |  |  |  |

**ASK ALL**

S13b. What methods are you doing currently/have you used in the past to lose weight? *Please select all per row.*

|  | **MULTI-SELECT GRID; RANDOMIZE ROWS** | **Currently**  **(A)** | **Previously**  **(B)** | **Neither**  **(C)** |
| --- | --- | --- | --- | --- |
| 1 | **Self-managed lifestyle changes**  (e.g., diet and exercise) |  |  |  |
| 2 | **Pre-made meal prep services for weight loss** (e.g., Jenny Craig, Nutrisystem, Factor75, BistroMD, Optavia) |  |  |  |
| 3 | **Supported lifestyle changes** (e.g., weight loss support group, nutritionist/dietician) |  |  |  |
| 4 | **Medication prescribed by a health care professional**  **SHOW FOR ALL REGARDLESS OF WHAT IS SELECTED IN S13a** | **IF S13a=1, SHOW GREYED OUT CHECKMARK TO INDICATE RESPONSE WAS ALREADY SELECTED FOR THEM BASED ON S13a** |  |  |
| 5 | **Medication or supplement purchased over the counter (without a prescription) in pharmacy/drug store**  **SHOW FOR ALL REGARDLESS OF WHAT IS SELECTED IN S13a** |  |  |  |
| 6 | **Medication purchased online**  **SHOW FOR ALL REGARDLESS OF WHAT IS SELECTED IN S13a** |  |  |  |
| 7 | **Weight loss programs/apps** (e.g., Weight Watchers, Noom) |  |  |  |
| 8 | **Meal replacements** (e.g., shakes/bars) |  |  |  |
| 9 | **Herbal remedies/ teas/over-the-counter fat burners, fat blocker, digestive cleansers, etc.** |  |  |  |
| 10 | **Exercise plan (self-implemented or with professional trainer)** |  |  |  |
| 95 | **Other: [Specify] ANCHOR** |  |  |  |

**TERMINATE IF S13b_4, 5, OR 6 ≠ A**

**ASK ALL**

S14. Which of the following are you currently taking/have you previously taken for **weight loss**?

*Please select all that apply.*

|  | **MULTI-SELECT; RANDOMIZE ROWS** | **SHOW COLUMN IF S13b_4, 5 OR 6=A** | **SHOW COLUMN IF S13b_4, 5, OR 6=B** |
| --- | --- | --- | --- |
|  | **Weight loss treatment** | **Currently taking (A)** | **Previously taken but now stopped (B)** |
| 1 | Wegovy (semaglutide) |  |  |
| 2 | Mounjaro (tirzepatide) |  |  |
| 3 | Saxenda (liraglutide) |  |  |
| 4 | Ozempic (semaglutide) |  |  |
| 5 | Zepbound (tirzepatide) |  |  |
| 6 | Qsymia (phentermine/topiramate) |  |  |
| 7 | Contrave (naltrexone/bupropion) |  |  |
| 8 | Xenical/Alli (orlistat) |  |  |
| 9 | Adiplex/Lomaira/Suprenza (phentermine) |  |  |
| 95 | Other: **[Specify] ANCHOR** |  |  |
| 99 | None of the above **ANCHOR, MUTUALLY EXCLUSIVE** |  |  |

**TERMINATE IF HAVE NOT CURRENTLY TAKEN S14=1-9**

**FLAG IN DATA FILE IF RESPONDENT IS CURRENTLY TAKING 2+ MEDICATIONS AT S14_COL A**

**ASK ALL**

S14b. Which of the following treatments for weight loss have you considered taking?

|  | **MULTI-SELECT; RANDOMIZE; DO NOT PIPE TREATMENT THEY ARE CURRENTLY TAKING OR HAVE PREVIOUSLY TAKEN IN S14** |
| --- | --- |
| discussi | **Weight loss treatment** |
| 1 | Wegovy (semaglutide) |
| 2 | Mounjaro (tirzepatide) |
| 3 | Saxenda (liraglutide) |
| 4 | Ozempic (semaglutide) |
| 5 | Zepbound (tirzepatide) |
| 6 | None of the above ANCHOR, MUTUALLY EXCLUSIVE |

**CLASSIFY SAMPLE AS BELOW, IF PATIENT DOES NOT FIT IN THESE GROUPS, TERMINATE:**

- Current GLP1 Users: n=75 **(S14_1-5=A)**
- Current Non-GLP1 Users (have considered GLP1s): n=35 **(S14_6-9=A AND S14b=1-5)**
- Sub-Quotas:
  - Previous GLP1 Users: Min of n=30 **(S14_1-5=B)**
  - Have Fatty liver Disease (e.g., MASH/NASH, MASLD/MAFLD/NAFLD): Min of n=15 **(S12_4)**

**ASK S14c IF HAVE CONDITION BESIDES OBESITY IN S12**

S14c. Aside from taking weight loss medication, how many medications are you on for your following health condition(s)?

|  | **Number of medications** | **I am not taking any medication for this condition** |
| --- | --- | --- |
| **PIPE EACH CONDITION OUTSIDE OF OBESITY IN S12 AS A SEPARATE ROW** | ___ **[1-99]** |  |

**ASK ALL**

S15. Which types of health insurance do you currently have? *Select all that apply.*

| 1 | **HMO/PPO or other commercial insurance**  *E.g., private insurance through your employment or insurance you purchased through the exchange (healthcare.gov)* |
| --- | --- |
| 2 | **Medicaid**  *Designed for Americans with low household income or those unable to work due to disability* |
| 3 | **Medicare**  *Designed for Americans who are 65 years and older and some younger people with qualifying disabilities or conditions* |
| 4 | **Veteran’s Administration (VA) insurance or military benefits** |
| 5 | Don’t currently have health insurance/pay cash **MUTUALLY EXCLUSIVE** |
| 6 | Don’t know/not sure **MUTUALLY EXCLUSIVE** |
| 7 | Other type of coverage: **[Specify]** |

**TERMINATE IF ONLY 2, ONLY 3, OR ONLY 2 & 3 SELECTED**

**TERMINATE IF 65+ YEARS OLD AND SELECT S15_2-7 (MUST SELECT HMO/PPO OR OTHER COMMERCIAL INSURANCE IF 65+ YEARS OLD)**

**IF QUALIFIED:** Thank you for your responses so far. You qualify for this survey – it should take you about 15 minutes to complete from here.

**IF NOT QUALIFIED:** Thank you for your responses, however, we have reached our quota of individuals with your qualifications.

## SECTION A: HEALTH BACKGROUND

**READ SCREEN:** Throughout the remainder of the survey, you will see the term “health care professional”. Please note that health care professional is inclusive of medical doctors (MDs), doctors of osteopathic medicine (DOs), nurse practitioners (NPs), and physicians’ assistants (PAs).

This next set of questions will focus on your health background.

**ASK ALL**

A0. How would you rate your general health over the course of the last year? *Please respond in terms of your typical health, as opposed to anything that may be different due to a temporary circumstance.*

| **Poor** | **Fair** | **Good** | **Very Good** | **Excellent** |
| --- | --- | --- | --- | --- |
| 1 | 2 | c | 4 | 5 |

**ASK ALL**

A1a. How would you rate your activity level over the course of the last year?

| **Not at all active** |  |  | **Somewhat active** |  |  | **Extremely active** |
| --- | --- | --- | --- | --- | --- | --- |
| **1** | **2** | **3** | **4** | **5** | **6** | **7** |

**ASK ALL**

A1b. You mentioned that you have the following condition(s). How concerned are you about your health condition(s)?

|  | **Not at all concerned** |  |  | **Somewhat concerned** |  |  | **Extremely concerned** |
| --- | --- | --- | --- | --- | --- | --- | --- |
| **RANDOMIZE** | **1** | **2** | **3** | **4** | **5** | **6** | **7** |
| **[PIPE HEALTH CONDITIONS FROM S12]** |  |  |  |  |  |  |  |
| Obesity or overweight |  |  |  |  |  |  |  |

**ASK A1c AMONG THOSE WITH AT LEAST 1 OTHER HEALTH CONDITIONS IN S12, BESIDES OBESITY; ALWAYS INCLUDE OBESITY AS A ROW**

A1c. Which health condition are you most concerned about?

- **[PIPE ANY HEALTH CONDITIONS FROM S12 AS ROWS]**
- Obesity or overweight

**ASK ALL**

A2. How often do you typically seek the following types of medical care?

|  | **RANDOMIZE** | **At least 2-3x a year**  **(A)** | **Once a year**  **(B)** | **Every other year**  **(C)** | **Less than every other year**  **(D)** | **Never**  **(E)** | **Don’t remember/Can’t recall**  **(F)** |
| --- | --- | --- | --- | --- | --- | --- | --- |
| 1 | Routine care (e.g., annual physical, vision screening, dental cleaning) |  |  |  |  |  |  |
| 2 | Preventative care (e.g., staying up to date on vaccines, cancer screenings like colonoscopy or mammograms) |  |  |  |  |  |  |
| 3 | Care/management of **[INSERT HEALTH CONDITION MOST CONCERNED ABOUT IN A1c] IF NO HEALTH CONDITION SELECTED IN S12, ALWAYS SHOW “Obesity or overweight”** |  |  |  |  |  |  |
| 4 | Urgent Care/Emergency Room (e.g., for occasional treatment if suffer fall, have sporadic pain, very sick) |  |  |  |  |  |  |
| 5 | Lab visits (e.g., blood draws/tests, metabolic panel) |  |  |  |  |  |  |

**ASK ALL**

A3. Who do you consider to be your support system when it comes to managing your health/weight?

|  | **MULTI-SELECT; RANDOMIZE** |
| --- | --- |
| 1 | Spouse/partner |
| 2 | Children |
| 3 | Immediate or extended family members outside spouse/partner, children, or parents |
| 4 | Friends |
| 5 | Neighbors/Community members |
| 6 | Clergy/religious organizations |
| 7 | Support group |
| 8 | Parents |
| 95 | Other: **[Specify] ANCHOR** |
| 96 | I do not have a support system **ANCHOR, MUTUALLY EXCLUSIVE** |

**READ SCREEN:** This next set of questions will focus on your healthcare experiences related to managing your weight.

**ASK ALL**

B1. Have you ever been officially diagnosed with “obesity” (that is, by a medical professional)?

| 1 | Yes |
| --- | --- |
| 2 | No |
| 3 | Don’t know/not sure |

**ASK B2 AMONG THOSE DIAGNOSED WITH OBESITY (B1=1)**

B2. Which of the following best describes how you first learned about your obesity diagnosis? *Please select one.*

|  | **RANDOMIZE** |
| --- | --- |
| 1 | Health care professional told me during an appointment |
| 2 | Saw on my medical record during/after an appointment |
| 3 | I figured out my BMI by looking at the chart |
| 95 | Other: **[Specify] ANCHOR, MUTUALLY EXCLUSIVE** |

**ASK B3 AMONG THOSE DIAGNOSED WITH OBESITY (B1=1)**

B3. What type of health care professional diagnosed you with obesity? *Please select one.*

|  | **ALPHABETIZE AFTER B3=3 (NP/PA); LOCK ORDER OF 1-3** |
| --- | --- |
| 1 | Primary Care Physician (PCP) **LOCK ORDER** |
| 2 | Internal Medicine (IM) **LOCK ORDER** |
| 3 | Nurse Practitioner (NP)/Physician’s Assistant (PA)  **LOCK ORDER** |
| 4 | Osteopath |
| 5 | Nutritionist/Dietician |
| 6 | OB/GYN  **[ONLY SHOW IF NON-MALE, SELECTED S6=2-5]** |
| 7 | Rheumatologist |
| 8 | Cardiologist |
| 9 | Endocrinologist |
| 10 | Nephrologist |
| 11 | Psychiatrist/Therapist |
| 12 | Pulmonologist |
| 13 | Hepatologist |
| 14 | Weight management specialist |
| 15 | Oncologist |
| 16 | Gastroenterologist |
| 17 | Urologist |
| 18 | Pediatrician |
| 95 | Other: **[Specify] ANCHOR** |

**ASK B4 AMONG B2=1**

B4. How would you describe the tone of your health care professional when he/she diagnosed you with

obesity during your appointment? *Please select up to 3 responses.*

|  | **RANDOMIZE** |
| --- | --- |
| 1 | Casual |
| 2 | Disrespectful |
| 3 | Enthusiastic |
| 4 | Neutral |
| 5 | Serious |
| 6 | Formal |
| 7 | Respectful |
| 8 | Matter-of-fact |
| 9 | Condescending |
| 10 | Preachy |
| 11 | Supportive |
| 12 | Hopeful |
| 95 | Other: **[Specify] ANCHOR** |
| 96 | Don’t remember/can’t recall **ANCHOR, MUTUALLY EXCLUSIVE** |

**ASK B5 AMONG THOSE DIAGNOSED WITH OBESITY (B1=1)**

B5. Who, if anyone, did you discuss your obesity diagnosis with?

|  | **MULTI-SELECT; RANDOMIZE** |
| --- | --- |
| 1 | Spouse/partner |
| 2 | Children |
| 3 | Immediate or extended family members outside spouse/partner, children, or parents |
| 4 | Friends |
| 5 | Neighbors/Community members |
| 6 | Clergy/religious organizations |
| 7 | Support group |
| 8 | Parents |
| 95 | Other: **[Specify] ANCHOR** |
| 96 | I did not discuss with anyone **ANCHOR, MUTUALLY EXCLUSIVE** |

**Current Treatment Experience** **[IF CURRENTLY ON MULTIPLE MEDICATIONS IN S14_1-9, RANDOMLY ASSIGN 1 CURRENT MEDICATION ON LEAST FILL BASIS, PRIORITIZING S14_1-5. IF CURRENTLY ONLY ON S14_6-9, STILL RANDOMLY ASSIGN ON LEAST FILL BASIS]**

**INCLUDE COLUMN IN DATA FILE WITH ASSIGNED CURRENT MEDICATION**

**READ SCREEN:** Now, we will ask you some questions about your **current** experience with **[INSERT CURRENT MEDICATION FROM S14_1-9=A]**. Later, we will ask about your previous experience with weight loss treatment if applicable.

**ASK ALL**

C1. How long have you been on **[INSERT CURRENT MEDICATION FROM S14_1-9=A]**?

| 1 | 1 month |
| --- | --- |
| 2 | 2-5 months |
| 3 | 6-11 months |
| 4 | 1-2 years |
| 5 | 3-5 years |
| 6 | More than 5 years |

**FLAG IN DATA FILE IF RESPONDENT HAS BEEN ON WEGOVY (S14=1), MOUNJARO (S14=2), OR**

**ZEPBOUND (S14=5) FOR 3+ YEARS**

**ASK ALL**

C2. Which of the following best describes how you started to take **[INSERT CURRENT MEDICATION FROM**

**S14_1-9=A]**? *Please select one.*

| 1 | I requested this medication from a/my health care professional |
| --- | --- |
| 2 | A/My health care professional recommended this medication to me |
| 3 | I found this medication on my own/through someone I know |
| 4 | Other: **[Specify]** |

**ASK ALL**

C3. How soon after deciding to take/requesting/receiving a recommendation for **[INSERT CURRENT MEDICATION FROM S14_1-9=A]** did you obtain it?

| 1 | Immediately |
| --- | --- |
| 2 | Within a week |
| 3 | Within a month |
| 4 | Within 2-3 months |
| 5 | Within 6 months |
| 95 | Don’t remember/can’t recall **ANCHOR, MUTUALLY EXCLUSIVE** |

**ASK C4 IF C3_2-5**

C4. What, if anything, made you pause before obtaining **[INSERT CURRENT MEDICATION**

**FROM S14_1-9=A]**?

|  | **MULTI-SELECT; RANDOMIZE** |
| --- | --- |
| 1 | Cost |
| 2 | Insurance coverage/prior authorization needed **[SHOW IF S13b_1_4 - Currently taken Medication prescribed]** |
| 3 | Lack of guidance from health care professional |
| 4 | Nervous to start |
| 5 | Waiting for available medication supply |
| 6 | Delay in getting to the pharmacy |
| 7 | Didn’t have the time earlier |
| 95 | Other: **[Specify] ANCHOR** |

**ASK ALL**

C5. Before starting **[INSERT CURRENT MEDICATION FROM S14_1-9=A]**, which of the following topics did a health care professional discuss with you about it?

|  | **MULTI-SELECT; RANDOMIZE** |
| --- | --- |
| 1 | How to administer/take medication |
| 2 | Length of time I would need to be on the medication |
| 3 | Side effects (e.g., nausea, light-headedness/dizziness) |
| 4 | How the medication works scientifically |
| 5 | Short-term benefits (weight loss or otherwise) |
| 6 | Long-term benefits (weight loss or otherwise) |
| 7 | Supplementing medication with lifestyle changes (e.g., diet/exercise) |
| 95 | Other: **[Specify] ANCHOR** |
| 96 | None of the above **ANCHOR, MUTUALLY EXCLUSIVE** |

**ASK ALL**

C6. What types of questions did you ask a health care professional about **[INSERT CURRENT MEDICATION**

**FROM S14_1-9=A]**?

|  | **MULTI-SELECT; KEEP SAME ORDER SHOWN IN C5** |
| --- | --- |
| 1 | How to administer/take medication |
| 2 | Length of time I would need to be on the medication |
| 3 | Side effects (e.g., nausea, light-headedness/dizziness) |
| 4 | How the medication works scientifically |
| 5 | Short-term benefits (weight loss or otherwise) |
| 6 | Long-term benefits (weight loss or otherwise) |
| 7 | Supplementing medication with lifestyle changes (e.g., diet/exercise) |
| 95 | Other: **[Specify] ANCHOR** |
| 96 | None of the above **ANCHOR, MUTUALLY EXCLUSIVE** |

**ASK ALL**

C7. What instructions did a health care professional provide about taking **[INSERT CURRENT MEDICATION**

**FROM S14_1-9=A]**?

|  | **MULTI-SELECT; RANDOMIZE** |
| --- | --- |
| 1 | Areas to inject on body **[SHOW IF S14_1-5=A]** |
| 2 | Schedule for administering/taking the medication |
| 3 | How/where to store medication |
| 4 | Time of day to take medication |
| 5 | How to take medication (e.g., with food) |
| 95 | Other: **[Specify] ANCHOR** |
| 96 | None of the above **ANCHOR, MUTUALLY EXCLUSIVE** |

**ASK ALL**

C8. What were the main reasons you wanted to start taking **[INSERT CURRENT MEDICATION FROM S14_1-**

**9=A]?**

|  | **MULTI-SELECT; RANDOMIZE** |
| --- | --- |
| 1 | To **lose** weight for self-esteem/to feel better in body **LOCK ORDER WITH ROW 2** |
| 2 | To **lose** weight to be more comfortable being active **LOCK ORDER WITH ROW 1** |
| 3 | To **maintain** weight for self-esteem/to feel better in body **LOCK ORDER WITH ROW 4** |
| 4 | To **maintain** weight to be more comfortable being active **LOCK ORDER WITH ROW 3** |
| 5 | I was feeling unsuccessful in past efforts around lifestyle changes (e.g., in diet/exercise, weight loss programs, surgery, etc.) |
| 6 | I knew someone on the medication who is/was having success (e.g., friend, family, co-worker, etc.) |
| 7 | I wanted to manage other health condition(s) (e.g., blood sugar/A1C) in addition to weight **[IF HAVE CONDITION BESIDES OBESITY IN S12]** |
| 8 | For my long-term health |
| 9 | To feel more comfortable in clothing |
| 10 | To improve comfort with intimacy/sex |
| 95 | Other: **[Specify] ANCHOR** |

**ASK ALL**

C9. Which of the following factors, if any, were challenges for you before starting **[INSERT CURRENT**

**MEDICATION FROM S14_1-9=A]?**

|  | **MULTI-SELECT; RANDOMIZE** |
| --- | --- |
| 1 | Cost/copay |
| 2 | Insurance coverage issues (e.g., prior authorization) **[SHOW IF S13b_1_4 - Currently taken Medication prescribed]** |
| 3 | Availability issues/supply shortage of medication |
| 4 | Concerns about side effects |
| 5 | Concerns about being on a medication long-term |
| 95 | Other: **[Specify] ANCHOR** |
| 96 | None of the above **ANCHOR, MUTUALLY EXCLUSIVE** |

**ASK ALL**

C9a. What was your **main goal** when starting **[INSERT CURRENT MEDICATION FROM S14_1-9=A]**? *Please*

*select one.*

|  | **RANDOMIZE** |
| --- | --- |
| 1 | To lose a specific number of pounds |
| 2 | To lose a specific percentage of body weight |
| 3 | To get to a specific clothing size |
| 4 | To lower A1C levels |
| 5 | To feel more confident in appearance/self-esteem |
| 6 | To improve other health condition(s) **[IF HAVE CONDITION BESIDES OBESITY IN S12]** |
| 7 | To improve my overall health |
| 95 | Other: **[Specify] ANCHOR** |

**ASK ALL**

C9b. How did you feel about **[INSERT CURRENT MEDICATION FROM S14_1-9=A]** before starting it? *Please select up to 3 responses.*

|  | **RANDOMIZE; MULTISELECT UP TO 3** |
| --- | --- |
| 1 | Anxious |
| 2 | Nervous |
| 3 | Scared |
| 4 | Ashamed |
| 5 | Guilty |
| 6 | Indifferent |
| 7 | Excited |
| 8 | Motivated |
| 9 | Enthusiastic |
| 10 | Hopeful |
| 11 | Relief |
| 12 | Grateful |
| 13 | Prepared |
| 14 | Happy |
| 95 | Other: **[Specify] ANCHOR** |

**ASK ALL**

C9c. How do you feel about **[INSERT CURRENT MEDICATION FROM S14_1-9=A]** now? *Please select up to 3*

*responses.*

|  | **RANDOMIZE; MULTISELECT UP TO 3** |
| --- | --- |
| 1 | Anxious |
| 2 | Nervous |
| 3 | Scared |
| 4 | Ashamed |
| 5 | Guilty |
| 6 | Indifferent |
| 7 | Excited |
| 8 | Motivated |
| 9 | Enthusiastic |
| 10 | Hopeful |
| 11 | Relief |
| 12 | Grateful |
| 13 | Prepared |
| 14 | Happy |
| 15 | Disappointed |
| 16 | Frustrated |
| 95 | Other: **[Specify] ANCHOR** |

**ASK ALL**

C10. How would you describe your overall experience on **[INSERT CURRENT MEDICATION FROM S14_1-9=A]** thus far?

| **1 -Extremely negative** | **2** | **3** | **4 - Neutral** | **5** | **6** | **7 -Extremely positive** |
| --- | --- | --- | --- | --- | --- | --- |

**ASK IF C10=4-7**

C11. What do you like about **[INSERT CURRENT MEDICATION FROM S14_1-9=A]**?

|  | **MULTI-SELECT; RANDOMIZE** |
| --- | --- |
| 1 | Easy to administer/take medication |
| 2 | Weight loss benefit |
| 3 | Ability to lower A1C |
| 4 | Tolerable side effects |
| 5 | Ability to lower blood pressure |
| 6 | Affordable |
| 7 | Makes me feel better about myself/body image/self-esteem |
| 8 | Reduces my appetite |
| 9 | Reduces my cravings |
| 10 | Changes the taste of unhealthy foods |
| 11 | Changes/reduces my thoughts around food (e.g., food noise) |
| 12 | Improves other health condition(s) of mine **[IF HAVE CONDITION BESIDES OBESITY IN S12]** |
| 13 | Improves comfort with intimacy/sex |
| 14 | Improves my overall health |
| 95 | Other: **[Specify] ANCHOR** |

**ASK IF C10=1-3**

C12. What do you dislike about **[INSERT CURRENT MEDICATION FROM S14_1-9=A]**?

|  | **MULTI-SELECT; RANDOMIZE** |
| --- | --- |
| 1 | Difficult/unpleasant/painful to administer/take medication |
| 2 | Minimal weight loss |
| 3 | Not losing any weight |
| 4 | Intolerable side effects (e.g., nausea, light-headedness/dizziness, gastrointestinal distress) |
| 5 | Too expensive |
| 6 | No change in appetite/amount I want/need to eat |
| 7 | No change in cravings/thoughts around food (e.g., food noise) |
| 8 | Supply shortages/issues getting the medication |
| 9 | Too much change in appetite/amount I want/need to eat |
| 10 | Not improving my other health condition(s) **[IF HAVE CONDITION BESIDES OBESITY IN S12]** |
| 95 | Other: **[Specify] ANCHOR** |

**ASK ALL**

C13. Where did you **initially** obtain **[INSERT CURRENT MEDICATION FROM S14_1-9=A]**? *Please select one.*

|  | **RANDOMIZE** |
| --- | --- |
| 1 | Retail Pharmacy (e.g., CVS Health, Walgreens, Walmart, Rite Aid) **[SHOW IF S13b_1_4 - Currently taken Medication prescribed]** |
| 2 | Specialty Pharmacy (e.g., CVS Caremark, Accredo, Optum Rx, Walgreens Specialty Pharmacy/Alliance Rx, Humana Specialty Pharmacy, Prime Therapeutics/BCBS) **[SHOW IF S13b_1_4 - Currently taken Medication prescribed]** |
| 3 | Mail order pharmacy (e.g., Express Scripts) **[SHOW IF S13b_1_4 - Currently taken Medication prescribed]** |
| 4 | Discount pharmacy (e.g., Amazon Pharmacy, CostPlus) **[SHOW IF S13b_1_4 - Currently taken Medication prescribed]** |
| 5 | Compounding Pharmacy (e.g., Ro, Hers, Hims) **[SHOW IF S13b_ 1 Row 5 or 6]** |
| 6 | MedSpa **[SHOW IF S13b_ 1 Row 5 or 6]** |
| 7 | I received a sample from my healthcare provider |
| 95 | Other: **[Specify] ANCHOR** |

**ASK ALL**

C14a. How would you rate your experience **initially** obtaining **[INSERT CURRENT MEDICATION FROM S14_1-9=A]**?

| **1 -Extremely difficult** | **2** | **3** | **4 - Neutral** | **5** | **6** | **7 -Extremely easy** |
| --- | --- | --- | --- | --- | --- | --- |

**ASK IF C14a=1-3; show on same page as C14a**

C14b. Please explain your rating.

**[INSERT LARGE TEXT BOX, OPEN-END]**

**ASK ALL**

C15. Where do you get refills/subsequent orders of **[INSERT CURRENT MEDICATION FROM S14_1-9=A]**? *Please select all that apply.*

|  | **RANDOMIZE; MULTI-SELECT** |
| --- | --- |
| 1 | Retail Pharmacy (e.g., CVS Health, Walgreens, Walmart, Rite Aid) **[SHOW IF S13b_1_4 - Currently taken Medication prescribed]** |
| 2 | Specialty Pharmacy (e.g., CVS Caremark, Accredo, Optum Rx, Walgreens Specialty Pharmacy/Alliance Rx, Humana Specialty Pharmacy, Prime Therapeutics/BCBS) **[SHOW IF S13b_1_4 - Currently taken Medication prescribed]** |
| 3 | Mail order pharmacy (e.g., Express Scripts) **[SHOW IF S13b_1_4 - Currently taken Medication prescribed]** |
| 4 | Discount pharmacy (e.g., Amazon Pharmacy, CostPlus) **[SHOW IF S13b_1_4 - Currently taken Medication prescribed]** |
| 5 | Compounding Pharmacy (e.g., Ro, Hers, Hims) **[SHOW IF S13b_1 Row 5 or 6]** |
| 6 | MedSpa **[SHOW IF S13b_1 Row 5 or 6]** |
| 95 | Other: **[Specify] ANCHOR** |
| 96 | Haven’t gotten refill yet **ANCHOR, MUTUALLY EXCLUSIVE** |

**ASK ALL**

C16a. How would you rate your experience getting refills/subsequent orders of **[INSERT CURRENT MEDICATION**

**FROM S14_1-9=A]**?

| **1 -Extremely difficult** | **2** | **3** | **4- Neutral** | **5** | **6** | **7 -Extremely easy** |
| --- | --- | --- | --- | --- | --- | --- |

**ASK C16b IF C16a=1-3; show on same page as C16a**

C16b. Please explain your rating.

**[INSERT LARGE TEXT BOX, OPEN-END]**

**ASK IF C13_1-6 RESPONSE IS DIFFERENT THAN C15_1-6 RESPONSE**

C17a. Please explain why the location you obtained **[INSERT CURRENT MEDICATION FROM S14_1-9=A]** changed

from a **[INSERT LOCATION FROM C13]** to a **[INSERT LOCATION FROM C15].**

**[INSERT LARGE TEXT BOX, OPEN-END]**

**ASK ALL**

C17b. What would make the process for obtaining/refilling **[INSERT CURRENT MEDICATION FROM S14_1-**

**9=A]** easier?

|  | **MULTI-SELECT; RANDOMIZE** |
| --- | --- |
| 1 | Reminders on when to refill/repurchase |
| 2 | Communication about supply availability |
| 3 | Improved coverage/insurance access |
| 4 | Greater supply of medication |
| 5 | Lower cost/copay |
| 6 | Easier insurance approval process (e.g., faster prior authorization approval) **[SHOW IF S13b_1_4 - Currently taken Medication prescribed]** |
| 95 | Other: **[Specify] ANCHOR** |
| 96 | None of the above **ANCHOR, MUTUALLY EXCLUSIVE** |

**ASK ALL**

C18. How long do you expect to be on **[INSERT CURRENT MEDICATION FROM S14_1-**

**9=A]**?

| 1 | 1 month |
| --- | --- |
| 2 | 2-5 months |
| 3 | 6-11 months |
| 4 | 1-2 years |
| 5 | 3-5 years |
| 6 | 6-10 years |
| 7 | 11-20 years |
| 8 | Indefinitely |
| 9 | Until a specific event |
| 95 | Don’t know/not sure |

**ASK ALL**

C19. Have you discussed how long you plan to be on **[INSERT CURRENT MEDICATION FROM S14_1-9=A]** with

your health care professional?

| 1 | Yes |
| --- | --- |
| 2 | No, but plan to |
| 3 | No, and no plans to |

**ASK ALL**

C20. Who, if anyone, have you discussed being on **[INSERT CURRENT MEDICATION FROM S14_1-9=A]** with?

|  | **MULTI-SELECT; RANDOMIZE** |
| --- | --- |
| 1 | Spouse/partner |
| 2 | Children |
| 3 | Immediate or extended family members outside spouse/partner, children, or parents |
| 4 | Friends |
| 5 | Neighbors/Community members |
| 6 | Clergy/religious organizations |
| 7 | Support group |
| 8 | Parents |
| 95 | Other: **[Specify] ANCHOR** |
| 96 | I have not discussed with anyone **ANCHOR, MUTUALLY EXCLUSIVE** |

**Past Treatment Experience** **[SHOW AMONG THOSE WITH PREVIOUS MEDICATION EXPERIENCE IN S14_1-5=B. IF PREVIOUSLY ON MULTIPLE MEDICATIONS IN S14_1-5=B, RANDOMLY ASSIGN 1 PREVIOUS MEDICATION ON LEAST FILL BASIS, SKIP IF PREVIOUSLY ON S14_6-9 ONLY].**

**INCLUDE COLUMN IN DATA FILE WITH ASSIGNED PREVIOUS MEDICATION**

**READ SCREEN:** Now, we will ask you some questions about your **previous** experience with **[INSERT PREVIOUS MEDICATION FROM S14_1-5=B]**.

**ASK AMONG THOSE WITH PREVIOUS MEDICATION EXPERIENCE**

P1. How long were you on **[INSERT PREVIOUS MEDICATION FROM S14_1-5=B]**?

| 1 | 1 month |
| --- | --- |
| 2 | 2-5 months |
| 3 | 6-11 months |
| 4 | 1-2 years |
| 5 | 3-5 years |
| 6 | More than 5 years |

**FLAG IN DATA FILE IF RESPONDENT WAS ON WEGOVY (S14=1), MOUNJARO (S14=2), OR**

**ZEPBOUND (S14=5) FOR 3+ YEARS**

**ASK AMONG THOSE WITH PREVIOUS MEDICATION EXPERIENCE**

P2. Which of the following best describes how you started to take **[INSERT PREVIOUS MEDICATION FROM S14_1-5=B]**? *Please select one.*

| 1 | I requested this medication from a/my health care professional |
| --- | --- |
| 2 | A/My health care professional recommended this medication to me |
| 3 | I found this medication on my own/through someone I know |
| 4 | Other: **[Specify]** |

**ASK AMONG THOSE WITH PREVIOUS MEDICATION EXPERIENCE**

P3. How soon after deciding to take/requesting/receiving a recommendation for **[INSERT PREVIOUS MEDICATION FROM S14_1-5=B]** did you obtain it?

| 1 | Immediately |
| --- | --- |
| 2 | Within a week |
| 3 | Within a month |
| 4 | Within 2-3 months |
| 5 | Within 6 months |
| 95 | Don’t remember/can’t recall **ANCHOR, MUTUALLY EXCLUSIVE** |

**ASK P4 IF P3_2-5**

P4. What, if anything, made you pause before obtaining **[INSERT PREVIOUS MEDICATION FROM S14_1-5=B]**?

|  | **MULTI-SELECT; RANDOMIZE** |
| --- | --- |
| 1 | Cost |
| 2 | Insurance coverage/prior authorization needed **[SHOW IF S13b_2_4 - Previously taken Medication prescribed]** |
| 3 | Lack of guidance from health care professional |
| 4 | Nervous to start |
| 5 | Waiting for available medication supply |
| 6 | Delay in getting to the pharmacy |
| 7 | Didn’t have the time earlier |
| 95 | Other: **[Specify] ANCHOR** |

**ASK AMONG THOSE WITH PREVIOUS MEDICATION EXPERIENCE**

P5. Before starting **[INSERT PREVIOUS MEDICATION FROM S14_1-5=B]**, which of the following topics did a health care professional discuss with you about it?

|  | **MULTI-SELECT; RANDOMIZE** |
| --- | --- |
| 1 | How to administer/take medication |
| 2 | Length of time I would need to be on the medication |
| 3 | Side effects (e.g., nausea, light-headedness/dizziness) |
| 4 | How the medication works scientifically |
| 5 | Short-term benefits (weight loss or otherwise) |
| 6 | Long-term benefits (weight loss or otherwise) |
| 7 | Supplementing medication with lifestyle changes (e.g., diet/exercise) |
| 95 | Other: **[Specify] ANCHOR** |
| 96 | None of the above **ANCHOR, MUTUALLY EXCLUSIVE** |

**ASK AMONG THOSE WITH PREVIOUS MEDICATION EXPERIENCE**

P6. What types of questions did you ask a health care professional about **[INSERT PREVIOUS MEDICATION FROM S14_1-5=B]**?

|  | **MULTI-SELECT; KEEP SAME ORDER SHOWN IN P5** |
| --- | --- |
| 1 | How to administer/take medication |
| 2 | Length of time I would need to be on the medication |
| 3 | Side effects (e.g., nausea, light-headedness/dizziness) |
| 4 | How the medication works scientifically |
| 5 | Short-term benefits (weight loss or otherwise) |
| 6 | Long-term benefits (weight loss or otherwise) |
| 7 | Supplementing medication with lifestyle changes (e.g., diet/exercise) |
| 95 | Other: **[Specify] ANCHOR** |
| 96 | None of the above **ANCHOR, MUTUALLY EXCLUSIVE** |

**ASK AMONG THOSE WITH PREVIOUS MEDICATION EXPERIENCE**

P7. What instructions did a health care professional provide about taking **[INSERT PREVIOUS MEDICATION FROM S14_1-5=B]**?

|  | **MULTI-SELECT; RANDOMIZE** |
| --- | --- |
| 1 | Areas to inject on body **[SHOW IF S14_1-5=B]** |
| 2 | Schedule for administering/taking the medication |
| 3 | How/where to store medication |
| 4 | Time of day to take medication |
| 5 | How to take medication (e.g., with food) |
| 95 | Other: **[Specify] ANCHOR** |
| 96 | None of the above **ANCHOR, MUTUALLY EXCLUSIVE** |

**ASK AMONG THOSE WITH PREVIOUS MEDICATION EXPERIENCE**

P8. What were the main reasons you wanted to start taking **[INSERT PREVIOUS MEDICATION FROM S14_1-5=B]**?

|  | **MULTI-SELECT; RANDOMIZE** |
| --- | --- |
| 1 | To **lose** weight for self-esteem/to feel better in body **LOCK ORDER WITH ROW 2** |
| 2 | To **lose** weight to be more comfortable being active **LOCK ORDER WITH ROW 1** |
| 3 | To **maintain** weight for self-esteem/to feel better in body **LOCK ORDER WITH ROW 4** |
| 4 | To **maintain** weight to be more comfortable being active **LOCK ORDER WITH ROW 3** |
| 5 | I was feeling unsuccessful in past efforts around lifestyle changes (e.g., in diet/exercise, weight loss programs, surgery, etc.) |
| 6 | I knew someone on the medication who was having success (e.g., friend, family, co-worker, etc.) |
| 7 | I wanted to manage other health condition(s) (e.g., blood sugar/A1C) in addition to weight **[IF HAVE CONDITION BESIDES OBESITY IN S12]** |
| 8 | For my long-term health |
| 9 | To feel more comfortable in clothing |
| 10 | To improve comfort with intimacy/sex |
| 95 | Other: **[Specify] ANCHOR** |

**ASK AMONG THOSE WITH PREVIOUS MEDICATION EXPERIENCE**

P9. Which of the following factors, if any, were challenges for you before starting **[INSERT PREVIOUS MEDICATION FROM S14_1-5=B]**?

|  | **MULTI-SELECT; RANDOMIZE** |
| --- | --- |
| 1 | Cost/copay |
| 2 | Insurance coverage issues (e.g., prior authorization) **[SHOW IF S13b_2_4 - Previously taken Medication prescribed]** |
| 3 | Availability issues/supply shortage of medication |
| 4 | Concerns about side effects |
| 5 | Concerns about being on a medication long-term |
| 95 | Other: **[Specify] ANCHOR** |
| 96 | None of the above **ANCHOR, MUTUALLY EXCLUSIVE** |

**ASK AMONG THOSE WITH PREVIOUS MEDICATION EXPERIENCE**

P9a. What was your **main goal** when starting **[INSERT PREVIOUS MEDICATION FROM S14_1-5=B]**? *Please*

*select one.*

|  | **RANDOMIZE** |
| --- | --- |
| 1 | To lose a specific number of pounds |
| 2 | To lose a specific percentage of body weight |
| 3 | To get to a specific clothing size |
| 4 | To lower A1C levels |
| 5 | To feel more confident in appearance/self-esteem |
| 6 | To improve other health condition(s) **[IF HAVE CONDITION BESIDES OBESITY IN S12]** |
| 7 | To improve my overall health |
| 95 | Other: **[Specify] ANCHOR** |

**ASK AMONG THOSE WITH PREVIOUS MEDICATION EXPERIENCE**

P9b. How did you feel about **[INSERT PREVIOUS MEDICATION FROM S14_1-5=B]** before starting it? *Please select up to 3 responses.*

|  | **RANDOMIZE; MULTISELECT UP TO 3** |
| --- | --- |
| 1 | Anxious |
| 2 | Nervous |
| 3 | Scared |
| 4 | Ashamed |
| 5 | Guilty |
| 6 | Indifferent |
| 7 | Excited |
| 8 | Motivated |
| 9 | Enthusiastic |
| 10 | Hopeful |
| 11 | Relief |
| 12 | Grateful |
| 13 | Prepared |
| 14 | Happy |
| 95 | Other: **[Specify] ANCHOR** |

**ASK AMONG THOSE WITH PREVIOUS MEDICATION EXPERIENCE**

P10. How would you describe your overall experience on **[INSERT PREVIOUS MEDICATION FROM S14_1-5=B]**?

| **1 -Extremely negative** | **2** | **3** | **4 - Neutral** | **5** | **6** | **7 -Extremely positive** |
| --- | --- | --- | --- | --- | --- | --- |

**ASK P11 IF P10=4-7**

P11. What did you like about **[INSERT PREVIOUS MEDICATION FROM S14_1-5=B]**?

|  | **MULTI-SELECT; RANDOMIZE** |
| --- | --- |
| 1 | Easy to administer/take medication |
| 2 | Weight loss benefit |
| 3 | Ability to lower A1C |
| 4 | Tolerable side effects |
| 5 | Ability to lower blood pressure |
| 6 | Affordable |
| 7 | Made me feel better about myself/body image/self-esteem |
| 8 | Reduced my appetite |
| 9 | Reduced my cravings |
| 10 | Changed the taste of unhealthy foods |
| 11 | Changed/reduced my thoughts around food (e.g., food noise) |
| 12 | Improved other health condition(s) of mine **[IF HAVE CONDITION BESIDES OBESITY IN S12]** |
| 13 | Improved comfort with intimacy/sex |
| 14 | Improved my overall health |
| 95 | Other: **[Specify] ANCHOR** |

**ASK AMONG THOSE WITH PREVIOUS MEDICATION EXPERIENCE**

P13. Where did you **initially** obtain **[INSERT PREVIOUS MEDICATION FROM S14_1-5=B]**? *Please select*

*one.*

|  | **RANDOMIZE** |
| --- | --- |
| 1 | Retail Pharmacy (e.g., CVS Health, Walgreens, Walmart, Rite Aid) **[SHOW IF S13b_2_4 - Previously taken Medication prescribed]** |
| 2 | Specialty Pharmacy (e.g., CVS Caremark, Accredo, Optum Rx, Walgreens Specialty Pharmacy/Alliance Rx, Humana Specialty Pharmacy, Prime Therapeutics/BCBS **[SHOW IF S13b_2_4 - previously taken Medication prescribed]** |
| 3 | Mail order pharmacy (e.g., Express Scripts) **[SHOW IF S13b_2_4 - previously taken Medication prescribed]** |
| 4 | Discount pharmacy (e.g., Amazon Pharmacy, CostPlus) **[SHOW IF S13b_2_4 - previously taken Medication prescribed]** |
| 5 | Compounding Pharmacy (e.g., Ro, Hers, Hims) **[SHOW IF S13b_2 Row 5 or 6]** |
| 6 | MedSpa **[SHOW IF S13b=5 or 6]** |
| 7 | I received a sample from my healthcare provider |
| 95 | Other: **[Specify] ANCHOR** |

**ASK AMONG THOSE WITH PREVIOUS MEDICATION EXPERIENCE**

P14a. How would you rate your experience **initially** obtaining **[INSERT PREVIOUS MEDICATION FROM S14_1-5=B]**?

| **1 -Extremely difficult** | **2** | **3** | **4 - Neutral** | **5** | **6** | **7 -Extremely easy** |
| --- | --- | --- | --- | --- | --- | --- |

**ASK P14b IF P14a=1-3; show on same page as P14a**

P14b. Please explain your rating.

**[INSERT LARGE TEXT BOX, OPEN-END]**

**ASK AMONG THOSE WITH PREVIOUS MEDICATION EXPERIENCE**

P15. Where did you get refills/subsequent orders of **[INSERT PREVIOUS MEDICATION FROM S14_1-5=B]**? *Please select all that apply.*

|  | **RANDOMIZE; MULTI-SELECT** |
| --- | --- |
| 1 | Retail Pharmacy (e.g., CVS Health, Walgreens, Walmart, Rite Aid) **[SHOW IF S13b_2_4 - previously taken Medication prescribed]** |
| 2 | Specialty Pharmacy (e.g., CVS Caremark, Accredo, Optum Rx, Walgreens Specialty Pharmacy/Alliance Rx, Humana Specialty Pharmacy, Prime Therapeutics/BCBS) **[SHOW IF S13b_2_4 - previously taken Medication prescribed]** |
| 3 | Mail order pharmacy (e.g., Express Scripts) **[SHOW IF S13b_2_4 - previously taken Medication prescribed]** |
| 4 | Discount pharmacy (e.g., Amazon Pharmacy, CostPlus) **[SHOW IF S13b_2_4 - previously taken Medication prescribed]** |
| 5 | Compounding Pharmacy (e.g., Ro, Hers, Hims) **[SHOW IF S13b_2 Row 5 or 6]** |
| 6 | MedSpa **[SHOW IF S13b_2 Row 5 or 6]** |
| 95 | Other: **[Specify] ANCHOR** |

**ASK AMONG THOSE WITH PREVIOUS MEDICATION EXPERIENCE**

P16a. How would you rate your experience getting refills/subsequent orders of **[INSERT PREVIOUS MEDICATION FROM S14_1-5=B]**?

| **1 -Extremely difficult** | **2** | **3** | **4- Neutral** | **5** | **6** | **7 -Extremely easy** |
| --- | --- | --- | --- | --- | --- | --- |

**ASK P16b IF P16a=1-3; show on same page as P16a**

P16b. Please explain your rating.

**[INSERT LARGE TEXT BOX, OPEN-END]**

**ASK AMONG THOSE WITH PREVIOUS MEDICATION EXPERIENCE**

P17. What would have made the process for obtaining/refilling **[INSERT PREVIOUS MEDICATION FROM S14_1-5=B]** easier?

|  | **MULTI-SELECT; RANDOMIZE** |
| --- | --- |
| 1 | Reminders on when to refill/repurchase |
| 2 | Communication about supply availability |
| 3 | Improved coverage/insurance access |
| 4 | Greater supply of medication |
| 5 | Lower cost/copay |
| 6 | Easier insurance approval process (e.g., faster prior authorization approval) **[SHOW IF S13b_2_4 - previously taken Medication prescribed]** |
| 95 | Other: **[Specify] ANCHOR** |
| 96 | None of the above **ANCHOR, MUTUALLY EXCLUSIVE** |

**ASK AMONG THOSE WITH PREVIOUS MEDICATION EXPERIENCE**

P18. Who, if anyone, did you discuss being on **[INSERT PREVIOUS MEDICATION FROM S14_1-5=B]** with?

|  | **MULTI-SELECT; RANDOMIZE** |
| --- | --- |
| 1 | Spouse/partner |
| 2 | Children |
| 3 | Immediate or extended family members outside spouse/partner, children, or parents |
| 4 | Friends |
| 5 | Neighbors/Community members |
| 6 | Clergy/religious organizations |
| 7 | Support group |
| 8 | Parents |
| 95 | Other: **[Specify] ANCHOR** |
| 96 | I did not discuss with anyone **ANCHOR, MUTUALLY EXCLUSIVE** |

**ASK AMONG THOSE WITH PREVIOUS MEDICATION EXPERIENCE**

P19. What were your reasons for no longer taking **[INSERT PREVIOUS MEDICATION FROM S14_1-5=B]**?

|  | **MULTI-SELECT; RANDOMIZE** |
| --- | --- |
| 1 | Difficult/unpleasant/painful to administer/take medication |
| 2 | Minimal/not enough weight loss |
| 3 | Didn’t lose any weight |
| 4 | Intolerable side effects (e.g., nausea, light-headedness/dizziness, gastrointestinal distress) |
| 5 | Too expensive |
| 6 | No change in appetite/amount I wanted/needed to eat |
| 7 | No change in cravings/thoughts around food (e.g., food noise) |
| 8 | Supply shortages/issues getting the medication |
| 9 | Insurance changed/would no longer cover |
| 10 | Too much change in appetite/amount I want/need to eat |
| 11 | Not improving my other health condition(s) **[IF HAVE CONDITION BESIDES OBESITY IN S12]** |
| 95 | Other: **[Specify] ANCHOR** |

**FINANCIAL COSTS [INSERT SAME CURRENT AND PREVIOUS MEDICATION ASSIGNED ABOVE FOR THESE QUESTIONS]**

**READ SCREEN:** Next, we will ask you some questions related to financial costs of weight loss methods.

**ASK ALL**

F1. What is the average **[SHOW IF S13b_1_4 – Currently taken Medication prescribed: out-of-pocket]** price you pay per month for **[INSERT CURRENT MEDICATION FROM S14_1-9=A]**?

| 1 | $0 |
| --- | --- |
| 2 | $1 -$24 |
| 3 | $25-$49 |
| 4 | $50-$99 |
| 5 | $100-$199 |
| 6 | $200-$399 |
| 7 | $400+ |
| 95 | Other: **[Specify]** |
| 96 | Don’t recall |
| 97 | Prefer not to answer |

**ASK ALL**

F1b. Are you using a savings or discount card from a pharmaceutical manufacturer or another third-party

provider (e.g., GoodRx) towards the price you pay for **[INSERT CURRENT MEDICATION FROM S14_1-**

**9=A]**?

| 1 | Yes |
| --- | --- |
| 2 | No |
| 3 | Don’t know/not sure |

**ASK F2 IF F1=2-95**

F2. For how long can you continue to pay **[INSERT PRICE FROM F1]** per month for **[INSERT CURRENT MEDICATION FROM S14_1-9=A]**?

| 1 | 1 month |
| --- | --- |
| 2 | 2-5 months |
| 3 | 6-11 months |
| 4 | 1-2 years |
| 5 | 3-5 years |
| 6 | More than 5 years |
| 95 | Other: **[Specify]** |
| 96 | I cannot keep paying this price per month |
| 97 | Prefer not to answer |

**Van Westendorp Price Sensitivity Questions**

**SHOW F3-F6 ON THE SAME SCREEN**

**ASK ALL**

F3. At what **[SHOW IF S13b_1_4 – Currently taken Medication prescribed: out-of-pocket]** price would you consider **[INSERT CURRENT MEDICATION FROM S14_1-9=A]** to be **so expensive that you would not consider filling the prescription/buying it**?

$___________ Per Month

**[RANGE $0-$999,999]**

**ASK ALL**

F4. At what **[SHOW IF S13b_1_4 – Currently taken Medication prescribed: out-of-pocket]** price would you consider **[INSERT CURRENT MEDICATION FROM S14_1-9=A]** to get expensive, so that it is **not out of the question, but you would have to give it some thought to** fill the prescription/buy it?

$___________ Per Month

**[RANGE $0- $999,999] [RESPONSE MUST BE <F3 RESPONSE]**

**ASK ALL**

F5. At what **[SHOW IF S13b_1_4 – Currently taken Medication prescribed: out-of-pocket]** price would you consider **[INSERT CURRENT MEDICATION FROM S14_1-9=A]** to be **a bargain – a great buy for the money**?

$___________ Per Month

**[RANGE $0-$999,999] [RESPONSE MUST BE ≤F4 RESPONSE]**

**ASK ALL**

F6. At what **[SHOW IF S13b_1_4 – Currently taken Medication prescribed: out-of-pocket]** price would you consider **[INSERT CURRENT MEDICATION FROM S14_1-9=A]** to be **priced so low that you feel the clinical quality (e.g., efficacy and safety) couldn’t be very good**?

$___________ Per Month

**[RANGE $0-$999,999] [RESPONSE MUST BE <F5 RESPONSE]**

**ASK ALL**

F7. How much are you willing to spend on a weight loss medication vs. other weight loss methods (e.g.,

weight management program, meal plan, gym membership, working with a nutritionist/dietitian, etc.)?

| I am willing to spend **much less on a weight loss medication** vs. other weight loss methods |  | I am willing to **spend the same** on a weight loss medication vs. other weight loss methods |  | I am willing to spend **much more on a weight loss medication** vs. other weight loss methods |
| --- | --- | --- | --- | --- |
| 1 | 2 | 3 | 4 | 5 |

**ASK ALL; show F8 on same page as F7**

F8. Please explain your response.

**[INSERT LARGE TEXT BOX, OPEN-END]**

**ASK AMONG THOSE WITH PREVIOUS MEDICATION EXPERIENCE**

F9. Now, thinking back to when you were taking **[INSERT PREVIOUS MEDICATION FROM S14_1-5=B],** what is

the average **[SHOW IF S13b_1_4 – Previously taken Medication prescribed: out-of-pocket]** price you paid per month for **[INSERT PREVIOUS MEDICATION FROM S14_1-5=B]**?

| 1 | $0 |
| --- | --- |
| 2 | $1 -$24 |
| 3 | $25-$49 |
| 4 | $50-$99 |
| 5 | $100-$199 |
| 6 | $200-$399 |
| 7 | $400+ |
| 95 | Other: **[Specify]** |
| 96 | Don’t recall |
| 97 | Prefer not to answer |

**ASK IF S14_1-5=B**

F10. Did you use a savings or discount card from a pharmaceutical manufacturer or another third-party

provider (e.g., GoodRx) towards the price you paid for **[INSERT PREVIOUS MEDICATION FROM S14_1-**

**5=B]**?

| 1 | Yes |
| --- | --- |
| 2 | No |
| 3 | Don’t know/not sure |

**SWITCHING WEIGHT LOSS METHODS & GOALS**

**READ SCREEN:** Next, we will ask you some questions related to your thoughts about switching to other weight loss methods and your overall goals in being on a weight loss medication.

**ASK ALL**

M1. Since you started taking **[INSERT CURRENT MEDICATION FROM S14_1-9=A]**, have you ever considered switching weight loss medications?

| 1 | Yes |
| --- | --- |
| 2 | No |

**ASK M2 IF M1=1**

M2. Please explain why you have considered switching weight loss medications.

**[INSERT LARGE TEXT BOX, OPEN-END]**

**ASK M3 IF M1=1**

M3. After starting **[INSERT CURRENT MEDICATION FROM S14_1-9=A]**, which of the following weight loss

medications, if any, did you consider switching to?

|  | **MULTI-SELECT; RANDOMIZE; DO NOT PIPE TREATMENT THEY ARE CURRENTLY TAKEN OR HAVE PREVIOUSLY TAKEN IN S14** |
| --- | --- |
|  | **Weight loss treatment** |
| 1 | Wegovy (semaglutide) |
| 2 | Mounjaro (tirzepatide) |
| 3 | Saxenda (liraglutide) |
| 4 | Ozempic (semaglutide) |
| 5 | Zepbound (tirzepatide) |
| 95 | Other: [SPECIFY] ANCHOR |
| 96 | None of the above ANCHOR, MUTUALLY EXCLUSIVE |

**ASK ALL**

M4. What is the likelihood of your switching to another weight loss medication within the next 3 months?

| **1 -Not at all likely to switch** | **2** | **3** | **4 – Somewhat likely to switch** | **5** | **6** | **7 -Extremely likely to switch** |
| --- | --- | --- | --- | --- | --- | --- |

**Outlook on Future Weight Loss Medications**

**READ SCREEN:** Next, we will ask you some questions related to your thoughts about future weight loss medications.

**ASK ALL**

W1. When thinking about your ideal weight loss medication, what **3 factors** are most important?

|  | **RANDOMIZE; MULTI-SELECT** |
| --- | --- |
| 1 | How it is administered/taken |
| 2 | Dosing/frequency of use |
| 3 | Tolerable side effects |
| 4 | Overall safety profile |
| 5 | Overall efficacy/weight loss |
| 6 | Short-term weight loss benefits |
| 7 | Long-term weight loss benefits |
| 8 | Ease of use |
| 9 | Benefits outside of weight loss (e.g., lower A1C, lower blood pressure, lower cholesterol, etc.) |
| 10 | Minimal time on medication |
| 11 | Cost of medication |
| 95 | Other: **[Specify] ANCHOR** |

**ASK ALL**

W2. How interested are you in participating in the following patient support program?

*This platform would offer you: regular meetings with a dedicated care team of healthcare providers, personalized treatment options, access to pharmacy services that facilitate direct delivery of medication to patients and potentially at lowers costs, along with advice/tips around managing your weight. Please assume this platform would be covered by most insurance plans.*

| **1 - Not at all interested** | **2** | **3** | **4 – Somewhat interested** | **5** | **6** | **7 -Extremely interested** |
| --- | --- | --- | --- | --- | --- | --- |

**Fatty Liver Disease**

**READ SCREEN:** Next, we will ask you some broader questions related to a separate health condition.

**ASK IF DOES NOT HAVE FATTY LIVER DISEASE IN S12_4; AUTOCODE FOR THOSE WITH S12_4**

E1. Are you aware of Fatty Liver Disease (e.g., MASH/NASH, MASLD/MAFLD/NAFLD)?

| 1 | Yes |
| --- | --- |
| 2 | No |
| 3 | Don’t know/not sure |

**ASK E2a IF E1=1; AUTOCODE FOR THOSE WITH FATTY LIVER DISEASE (S12_4)**

E2a. Have you ever been formally **tested for** Fatty Liver Disease (e.g., MASH/NASH, MASLD/MAFLD/NAFLD)?

| 1 | Yes |
| --- | --- |
| 2 | No |
| 3 | Don’t know/not sure |

**ASK E2b IF E2a=1 OR HAS FATTY LIVER DISEASE IN S12_4**

E2b. What specific tests have you done to test for Fatty Liver Disease (e.g., MASH/NASH,MASLD/MAFLD/NAFLD)?

|  | **MULTI-SELECT; RANDOMIZE** |
| --- | --- |
| 1 | Blood test |
| 2 | Imaging (e.g., Ultrasound, CT, MRI) |
| 3 | Liver biopsy |
| 4 | FIB4 |
| 5 | Don’t know/not sure **[Specify] ANCHOR** |

**ASK E2c IF E1=1; AUTOCODE FOR THOSE WITH FATTY LIVER DISEASE (S12_4)**

E2c. Have you ever been formally **diagnosed** **with** Fatty Liver Disease (e.g., MASH/NASH, MASLD/MAFLD/NAFLD)?

| 1 | Yes |
| --- | --- |
| 2 | No |
| 3 | Don’t know/not sure |

**ASK E3 IF E1=1; SKIP IF HAS FATTY LIVER DISEASE (S12_4)**

E3. How concerned are you about Fatty Liver Disease (e.g., MASH/NASH, MASLD/MAFLD/NAFLD)?

| **1 -Not at all concerned** | **2** | **3** | **4 – Somewhat concerned** | **5** | **6** | **7 -Extremely concerned** |
| --- | --- | --- | --- | --- | --- | --- |

**ASK E4 IF E2c=1 OR HAS FATTY LIVER DISEASE IN S12_4**

E4. Are you currently taking Rezdiffra (resmetirom) for Fatty Liver Disease (e.g., MASH/NASH, MASLD/MAFLD/NAFLD)?

| 1 | Yes |
| --- | --- |
| 2 | No |
| 3 | Don’t know/not sure |

**ASK E5 IF E2c=1 OR HAS FATTY LIVER DISEASE (S12_4) AND E4=2 OR 3**

E5. Have you talked to your doctor about taking Rezdiffra (resmetirom) for Fatty Liver Disease (e.g., MASH/NASH, MASLD/MAFLD/NAFLD)?

| 1 | Yes |
| --- | --- |
| 2 | No |
| 3 | Don’t know/not sure |

**ASK E6 IF E1=1 OR HAS FATTY LIVER DISEASE (S12_4)**

E6. Are you aware that Fatty Liver Disease (e.g., MASH/NASH, MASLD/MAFLD/NAFLD) and obesity are interrelated (one has an impact on the other)?

| 1 | Yes |
| --- | --- |
| 2 | No |

**ASK E7 IF E6=1**

E7. How did you become aware that Fatty Liver Disease (e.g., MASH/NASH, MASLD/MAFLD/NAFLD) and

obesity are interrelated? *Please select all that apply.*

|  | **MULTI-SELECT; RANDOMIZE** |
| --- | --- |
| 1 | I was told by a health care professional |
| 2 | I learned about it on the internet |
| 3 | A friend/family member told me |
| 4 | I was already aware at the time of my diagnosis |
| 5 | Social media |
| 6 | Other: **[Specify] ANCHOR** |
| 95 | Don’t know/not sure **[Specify] ANCHOR** |

**Demographics**

**READ SCREEN:** Thank you for your survey answers so far! This is the last set of questions, which are just for classification purposes.

**ASK ALL**

Z1. Which of the following **best describes** the area where you live?

|  | **RANDOMIZE** |
| --- | --- |
| 1 | Urban (within a large city limits) |
| 2 | Suburban (just outside of a large city limits) |
| 3 | Rural (not close to a large city) |
| 4 | In a small town |

**COMBINE Z1=3 AND Z1=4 IN DATA FILE**

**ASK ALL**

Z2. Please indicate your current marital status or living arrangement.

|  | **RANDOMIZE** |
| --- | --- |
| 1 | Single (e.g., never married, divorced, or widowed) |
| 2 | Married |
| 3 | Domestic partnership/Living with partner |
| 4 | Separated |
| 99 | Prefer not to answer **ANCHOR** |

**ASK ALL**

Z3. Which of the following best describes you?

| 1 | I am a full-time caregiver (e.g., for child(ren), partner, extended family) |
| --- | --- |
| 2 | I am a part-time caregiver (e.g., for child(ren), partner, extended family) |
| 3 | I have a caregiver |
| 4 | I neither have a caregiver, nor am a caregiver |

**ASK ALL**

Z4. What is your current employment status?

| 1 | Employed for wages |
| --- | --- |
| 2 | Self-employed |
| 3 | Full-time homemaker |
| 4 | Out of work for 1 year or more, but not retired |
| 5 | Out of work for less than 1 year, but not retired |
| 6 | Retired |
| 99 | Prefer not to answer |

**ASK ALL**

Z5. What is the highest level of school you have completed? *(If still attending, check present grade.)*

| 1 | Some high school or less, no diploma |
| --- | --- |
| 2 | High school graduate (or equivalency) |
| 3 | Some college, no degree |
| 4 | Associate degree |
| 5 | Bachelor’s degree |
| 6 | Graduate or professional degree |
| 99 | Prefer not to answer |

**ASK ALL**

Z6. Which of the following best represents your annual household income? Your response will be kept strictly confidential and will be used for research purposes only.

| 1 | Less than $50,000 |
| --- | --- |
| 2 | $50,000-$74,999 |
| 3 | $75,000-$99,999 |
| 4 | $100,000-$149,999 |
| 5 | $150,000-$199,999 |
| 6 | $200,000 or more |
| 99 | Prefer not to answer |

**ASK ALL**

Z8. Are you of Hispanic, Latinx or Spanish Origin?

| 1 | No, not of Hispanic, Latinx or Spanish origin |
| --- | --- |
| 2 | Yes, of Hispanic, Latinx or Spanish origin |
| 99 | Prefer not to answer |

**ASK ALL**

Z7. Which of the following best describes your race? *Select all that apply.*

|  | **RANDOMIZE** |
| --- | --- |
| 1 | Asian |
| 2 | Black or African American |
| 3 | Native American or Alaskan Native |
| 4 | Native Hawaiian or Other Pacific Islander |
| 5 | White |
| 6 | Prefer to self-describe: **[Specify] ANCHOR** |
| 99 | Prefer not to answer **ANCHOR, MUTUALLY EXCLUSIVE** |

**READ SCREEN:** Thank you so much for participating in our survey – we sincerely appreciate your feedback!
